# Supplementary material
Source: PubMed Central journal article supplement (PMC6830066)
Supplement: NIHMS1057288-supplement-Supplemental.pdf [file NIHMS1057288-supplement-Supplemental.pdf]

## Supporting Information

### Enhanced Fluorescence of Cy5-labeled DNA Tethered to Silver Island Films (SIFs): Fluorescence Images and Time-resolved Studies Using Single Molecule Spectroscopy

Yi Fu and Joseph R. Lakowicz\*

Figure S1. SEM images of SIF prepared using the method described in the experiment section. We thank Dr. Chandran R. Sabanayagam for providing technical support.

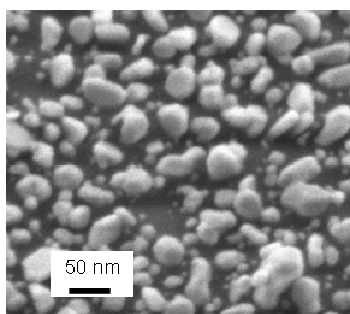

**Single-molecule lifetime fitting for intensity decays curves shown in Figure 7.**

The average lifetime  $\tau_{av}$  shown below the parameters is the intensity weighted average lifetime calculated from the result of the last fit.

$$\tau_{av} = \frac{\sum_i Ampl_i \cdot Lifet_i^2}{\sum_i Ampl_i Lifet_i}$$

|                    | Glass (Figure 7A insert) | SIF ( Figure 7B insert) |
|--------------------|--------------------------|-------------------------|
| Ampl <sub>1</sub>  | 1872                     | 1909.5                  |
| Lifet <sub>1</sub> | 2.38                     | 0.145                   |
| Ampl <sub>2</sub>  | —                        | 180.17                  |
| Lifet <sub>2</sub> | —                        | 0.766                   |
| $\chi^2$           | 1.033                    | 1.070                   |
| $\tau_{av}$ : (ns) | 2.38                     | 0.35                    |
